# Supplementary material
Source: publisher figshare collection journal article supplement (https://acs.figshare.com/ndownloader/files/34323381)
Supplement: Supplementary file 1 [file 34323381]

# Supporting Information

## Construction of $\text{Bi}_2\text{O}_2\text{Se}/\text{Bi}_2\text{Se}_3$ Van Der Waals Heterostructure for Self-powered and Broadband Photodetector

Ming Yu<sup>1</sup>, Chaocheng Fang<sup>1</sup>, Jianfu Han<sup>2</sup>, Wenliang Liu<sup>1\*</sup>, Shengmei Gao<sup>1</sup>, Kai Huang<sup>1\*</sup>

<sup>1</sup> School of Physics and Optoelectronics, Xiangtan University, Hunan, 411105, P. R. China

<sup>2</sup> Hunan Institute of Advanced Sensing and Information Technology, Xiangtan University, Hunan, 411105, P. R. China

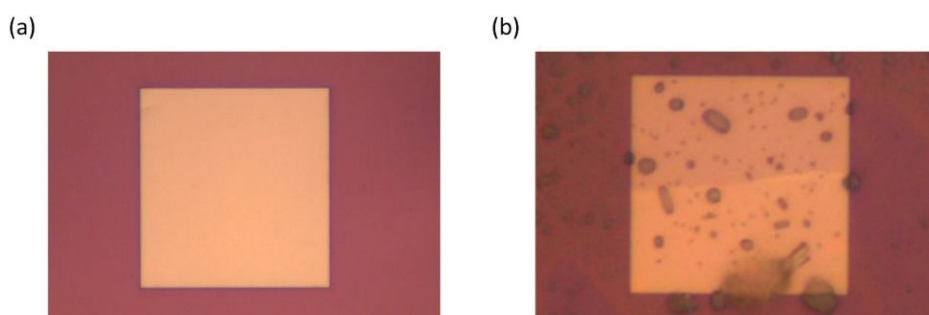

**Figure S-1.** The optical image of the transferred sample with (a) and without (b) small molecules naphthalene.

---

\* Corresponding author. E-mail address: huangk@xtu.edu.cn, wlliu@xtu.edu.cn.

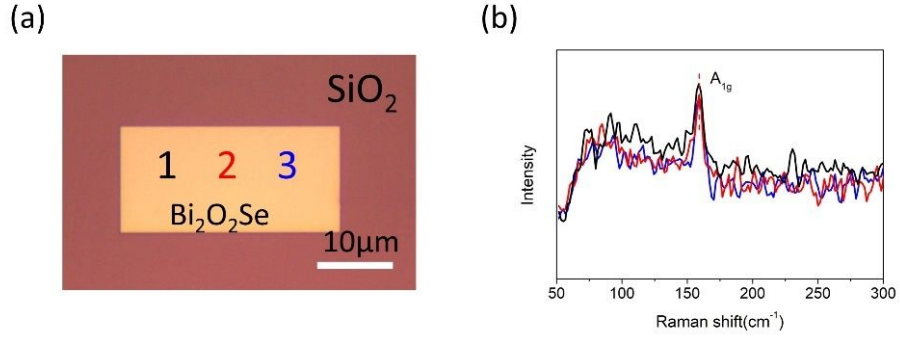

**Figure S-2.** (a) Optical image of samples transferred to a silicon substrate using the improved method. (b) The Raman characterization of different areas at the sample transferred to silicon substrate.

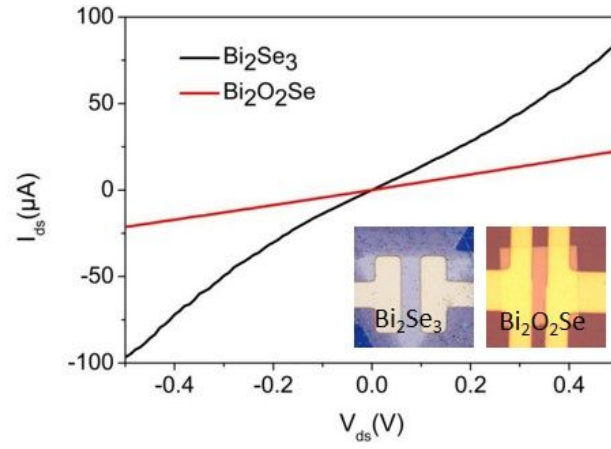

**Figure S-3.** The I-V characterizations of the individual  $\text{Bi}_2\text{O}_2\text{Se}$  and  $\text{Bi}_2\text{Se}_3$  nanosheets. Inset: Optical images of corresponding devices.

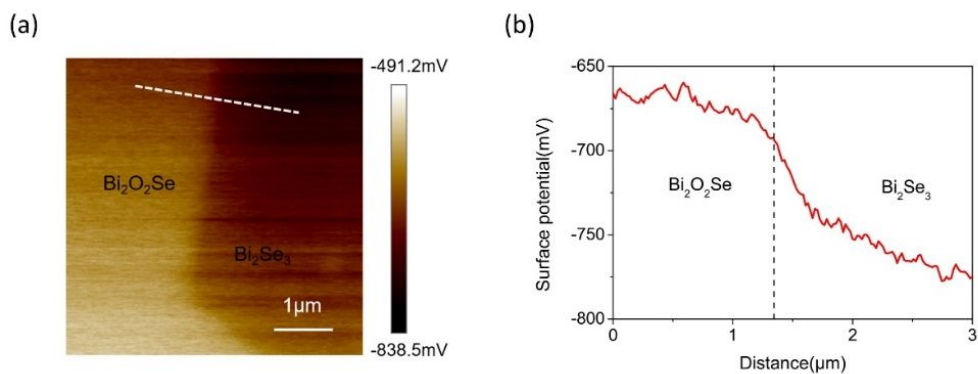

**Figure S-4.** (a) KPFM surface potential map of the heterostructure region (b) The surface potential profile across the sample corresponding to the dashed line in panel.

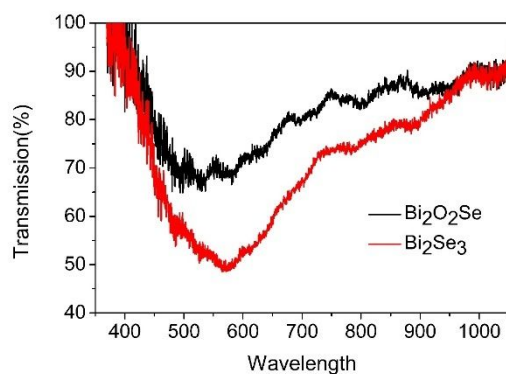

**Figure S-5.** The transmission characterization of the individual  $\text{Bi}_2\text{O}_2\text{Se}$  and  $\text{Bi}_2\text{Se}_3$  nanosheets.

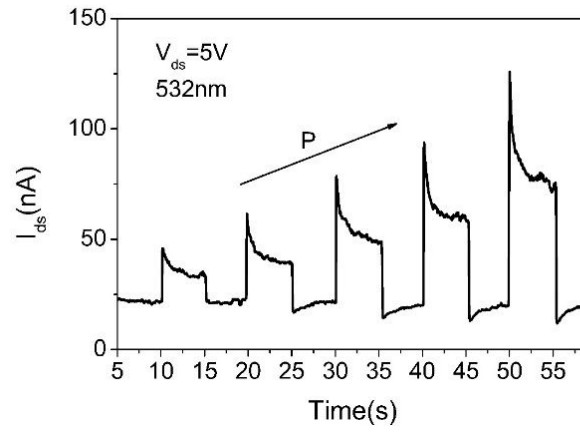

**Figure S-6.** Photoresponse of the heterostructure under different laser power (532 nm) at  $V_{ds} = 5$  V.

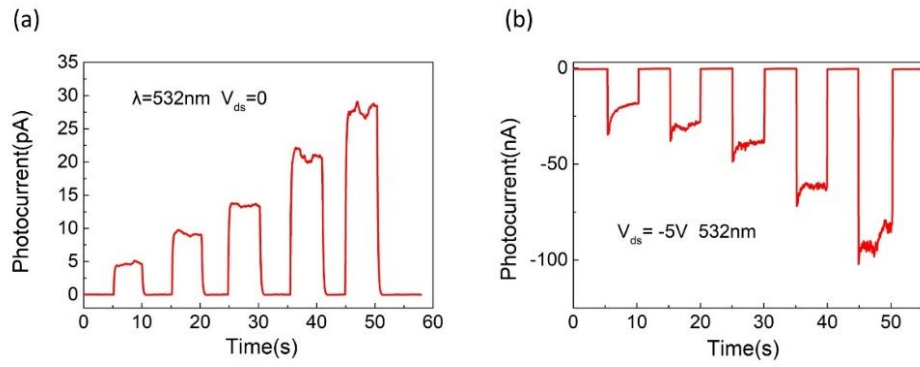

**Figure S-7.** I-T response curves of the heterostructure device at 0V (a) and -5V (b).
